# Supplementary material for: Unfolding of Helical Poly(L-Glutamic Acid) in N,N-Dimethylformamide Probed by Pyrene Excimer Fluorescence (PEF)
Source: MDPI journal article supplement (doi:10.3390/polym13111690), 2021-05-22
Supplement: s1 [file s1]

## Supplementary Material

# Unfolding of Helical Poly(*L*-Glutamic Acid) in *N,N*-Dimethylformamide Probed by Pyrene Excimer Fluorescence (PEF)

Weize Yuan, Remi Casier and Jean Duhamel \*

Institute for Polymer Research, Waterloo Institute of Nanotechnology, Department of Chemistry, University of Waterloo, Waterloo, ON N2L 3G1, Canada: w96yuan@mit.edu (W.Y.); remi.casier@uwaterloo.ca (R.C.)

\* Correspondence: jduhamel@uwaterloo.ca; Tel.: +1-519-888-4567 (ext. 35916)

### Table of Contents

|                                                                                     |   |
|-------------------------------------------------------------------------------------|---|
| (A) Equations Used to Analyze the Fluorescence Decays of Py-PLGA and Py-PDLGA. .... | 1 |
| (B) Example Global-Fit of the Monomer and Excimer Decays According to the FBM ..... | 3 |
| (C) Parameters Retrieved Using the FBM Analysis .....                               | 4 |

### (A) Equations Used to Analyze the Fluorescence Decays of Py-PLGA and Py-PDLGA.

The monomer and excimer decays of the pyrene-labeled PGAs were fit with Equations (S1) and (S2), respectively.

$$\begin{aligned}
 [Py^*]_{(t)} = & [Py_{diff}^*]_{(t)} + [Py_{k_2}^*]_{(t)} + [Py_{free}^*]_{(t)} = [Py_{diff}^*]_o \exp\left(-\left(A_2 + \frac{1}{\tau_M}\right)t - A_3(1 - \exp(-A_4 t))\right) \\
 & + \left([Py_{k_2}^*]_o + [Py_{diff}^*]_o e^{-A_3} \sum_{i=0}^{\infty} \frac{A_3^i}{i!} \frac{A_2 + iA_4}{A_2 + iA_4 - k_2}\right) \exp\left(-\left(k_2 + \frac{1}{\tau_M}\right)t\right) \\
 & - [Py_{diff}^*]_o e^{-A_3} \sum_{i=0}^{\infty} \frac{A_3^i}{i!} \frac{A_2 + iA_4}{A_2 + iA_4 - k_2} \exp\left(-\left(A_2 + iA_4 + \frac{1}{\tau_M}\right)t\right) \\
 & + [Py_{free}^*]_o \exp\left(-\frac{t}{\tau_M}\right)
 \end{aligned} \tag{S1}$$

$$[E^*]_{(t)} = [E0^*]_{(t)} + [D^*]_{(t)} + [ES^*]_{(t)} = k_2 \left( \left( [Py_{k_2}^*]_o + [Py_{diff}^*]_o e^{-A_3} \sum_{i=0}^{\infty} \frac{A_3^i}{i!} \frac{A_2 + iA_4}{A_2 + iA_4 - k_2} \right) \right)$$

$$\begin{aligned}
& \times \frac{\exp\left(-\frac{t}{\tau_{E0}}\right) - \exp\left(-\left(k_2 + \frac{1}{\tau_M}\right)t\right)}{k_2 + \frac{1}{\tau_M} - \frac{1}{\tau_{E0}}} \\
& + [Py_{diff}^*]_o e^{-A_3} \sum_{i=0}^{\infty} \frac{A_3^i}{i!} \frac{A_2 + iA_4}{A_2 + iA_4 - k_2} \frac{\exp\left(-\left(A_2 + iA_4 + \frac{1}{\tau_M}\right)t\right) - \exp\left(-\frac{t}{\tau_{E0}}\right)}{A_2 + iA_4 + \frac{1}{\tau_M} - \frac{1}{\tau_{E0}}} \Bigg) \\
& + k_2 \left( \left( [Py_{k2}^*]_o + [Py_{diff}^*]_o e^{-A_3} \sum_{i=0}^{\infty} \frac{A_3^i}{i!} \frac{A_2 + iA_4}{A_2 + iA_4 - k_2} \right) \times \frac{\exp\left(-\frac{t}{\tau_D}\right) - \exp\left(-\left(k_2 + \frac{1}{\tau_M}\right)t\right)}{k_2 + \frac{1}{\tau_M} - \frac{1}{\tau_D}} \right. \\
& \left. + [Py_{diff}^*]_o e^{-A_3} \sum_{i=0}^{\infty} \frac{A_3^i}{i!} \frac{A_2 + iA_4}{A_2 + iA_4 - k_2} \frac{\exp\left(-\left(A_2 + iA_4 + \frac{1}{\tau_M}\right)t\right) - \exp\left(-\frac{t}{\tau_D}\right)}{A_2 + iA_4 + \frac{1}{\tau_M} - \frac{1}{\tau_D}} \right) \\
& + [E0^*]_o \times \exp\left(-\frac{t}{\tau_{E0}}\right) + [D^*]_o \times \exp\left(-\frac{t}{\tau_D}\right)
\end{aligned} \tag{S2}$$

In Equations (S1) and (S2), the parameters  $A_2$ ,  $A_3$ , and  $A_4$  are given in Equation S3.a-c.

$$A_2 = \langle n \rangle \times \frac{k_{blob} k_e [blob]}{k_{blob} + k_e [blob]} \tag{S3.a}$$

$$A_3 = \langle n \rangle \times \left( \frac{k_{blob}}{k_{blob} + k_e [blob]} \right)^2 \tag{S3.b}$$

$$A_4 = k_{blob} + k_e [blob] \tag{S3.c}$$

A full description of the parameters in Equations (S1)–(S3) is provided in the Experimental section of the main text. Equation S1 yields the molar fractions  $f_{Mdiff}$ ,  $f_{Mk2}$ , and  $f_{Mfree}$  of the pyrene species  $Py_{diff}^*$ ,  $Py_{k2}^*$ , and  $Py_{free}^*$ , where the M-subscript indicates that these pyrene species were detected in the monomer fluorescence decays. Analysis of the excimer fluorescence decays with Equation S2 yields the molar fractions  $f_{EdiffE0}$ ,  $f_{EdiffD}$ ,  $f_{Ek2E0}$ ,  $f_{Ek2D}$ ,  $f_{EE0}$ , and  $f_{ED}$  of the pyrene species  $Py_{diffE0}^*$ ,  $Py_{diffD}^*$ ,  $Py_{k2E0}^*$ ,  $Py_{k2D}^*$ ,  $E0^*$ , and  $D^*$ , where the E-subscript indicates that these pyrene species were detected in the excimer fluorescence decays. The molar fractions obtained from the monomer or the excimer fluorescence decays were used to determine the molar fractions  $f_{diff}$ ,  $f_{k2}$ ,  $f_{free}$ ,  $f_{E0}$ , and  $f_D$  whose expressions are given in Equations (S4)–(S8).

$$f_{diff} = \frac{1}{1 + \frac{f_{Mk2} + f_{Mfree}}{f_{Mdiff}} + \frac{f_{EE0} + f_{ED}}{f_{EdiffE0} + f_{EdiffD}}} \quad (S4)$$

$$f_{k2} = f_{diff} \times \frac{f_{Mk2}}{f_{Mdiff}} = f_{diff} \times \frac{f_{Ek2E0} + f_{Ek2D}}{f_{EdiffE0} + f_{EdiffD}} \quad (S5)$$

$$f_{free} = f_{diff} \times \frac{f_{Mfree}}{f_{Mdiff}} \quad (S6)$$

$$f_{E0} = f_{diff} \times \frac{f_{EE0}}{f_{EdiffE0} + f_{EdiffD}} \quad (S7)$$

$$f_D = f_{diff} \times \frac{f_{ED}}{f_{EdiffE0} + f_{EdiffD}} \quad (S8)$$

**(B) Example Global-Fit of the Monomer and Excimer Decays According to the FBM**

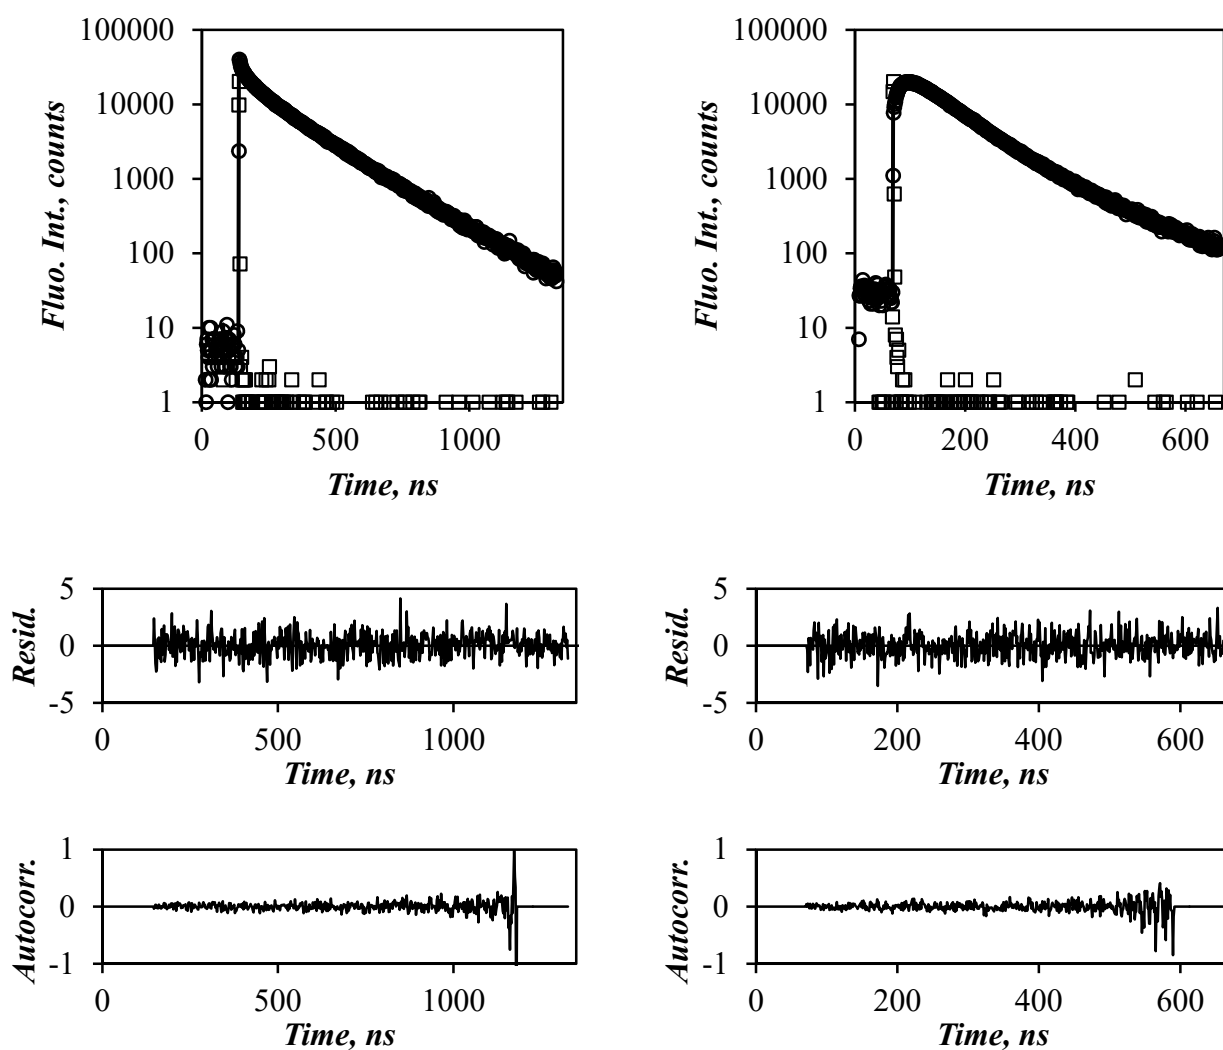

**Figure S1.** Monomer (left,  $\lambda_{em} = 375$  nm) and excimer (right,  $\lambda_{em} = 510$  nm) fluorescence decays ( $\square$ ) of Py(7.7)-PLGA in DMF containing 1.0 M GdHCl. The instrument response function ( $\circ$ ) and the fit of the global analysis of the FBM ( $—$ ) are overlaid with the fluorescence decays.  $\lambda_{ex} = 344$  nm,  $[Py] = 2.5 \times 10^{-6}$  M.  $\chi^2 = 1.10$ .

### (C) Parameters Retrieved Using the FBM Analysis

**Table S1.** Parameters retrieved using the FBM analysis of the monomer decays of Py( $x$ )-PLGA in DMF solutions containing GdHCl.

| [GdHCl] (M) | $\tau_M$ (ns) | $k_2$ (ns $^{-1}$ ) | $x$ (mol%) | $f_{Mk2}$ | $k_e[blob]$ ( $\mu s^{-1}$ ) | $\langle n \rangle$ | $k_{blob}$ ( $\mu s^{-1}$ ) | $f_{Mdiff}$ | $f_{Mfree}$ | $\chi^2$ |
|-------------|---------------|---------------------|------------|-----------|------------------------------|---------------------|-----------------------------|-------------|-------------|----------|
| 0.0         | 215           | 0.147               | 0.1        | 0.47      | 4.2                          | 3.12                | 11.3                        | 0.44        | 0.08        | 1.06     |
|             |               |                     | 4.4        | 0.21      | 3.5                          | 1.12                | 13.6                        | 0.51        | 0.25        | 1.14     |
|             |               |                     | 4.9        | 0.21      | 5.0                          | 1.15                | 10.9                        | 0.61        | 0.18        | 1.12     |
|             |               |                     | 6.9        | 0.35      | 5.3                          | 1.80                | 13.1                        | 0.52        | 0.11        | 1.04     |
|             |               |                     | 9.0        | 0.35      | 3.3                          | 1.83                | 11.8                        | 0.59        | 0.06        | 1.11     |
| 0.1         | 207           | 0.119               | 0.1        | 0.48      | 3.4                          | 2.53                | 11.1                        | 0.41        | 0.12        | 1.05     |
|             |               |                     | 4.4        | 0.21      | 1.0                          | 1.14                | 11.7                        | 0.44        | 0.36        | 1.18     |
|             |               |                     | 4.9        | 0.20      | 4.9                          | 1.15                | 11.1                        | 0.62        | 0.18        | 1.12     |
|             |               |                     | 6.9        | 0.36      | 4.1                          | 1.47                | 11.5                        | 0.44        | 0.20        | 1.21     |
|             |               |                     | 9.0        | 0.39      | 3.5                          | 1.75                | 13.3                        | 0.50        | 0.11        | 1.03     |
| 0.3         | 206           | 0.102               | 0.1        | 0.55      | 1.9                          | 2.24                | 9.6                         | 0.38        | 0.07        | 1.11     |
|             |               |                     | 4.4        | 0.21      | 2.3                          | 1.26                | 11.6                        | 0.38        | 0.41        | 1.09     |
|             |               |                     | 4.9        | 0.20      | 2.8                          | 1.22                | 11.1                        | 0.44        | 0.36        | 1.14     |
|             |               |                     | 6.9        | 0.33      | 6.8                          | 1.44                | 11.7                        | 0.50        | 0.18        | 1.16     |
|             |               |                     | 9.0        | 0.40      | 2.4                          | 1.60                | 9.8                         | 0.49        | 0.11        | 1.01     |
| 0.5         | 206           | 0.092               | 0.1        | 0.55      | 2.0                          | 2.17                | 8.8                         | 0.39        | 0.07        | 1.05     |
|             |               |                     | 4.4        | 0.23      | 1.3                          | 1.18                | 11.3                        | 0.39        | 0.38        | 1.14     |
|             |               |                     | 4.9        | 0.21      | 2.8                          | 1.16                | 10.5                        | 0.44        | 0.35        | 1.11     |
|             |               |                     | 6.9        | 0.27      | 3.5                          | 1.34                | 9.6                         | 0.53        | 0.19        | 1.11     |
|             |               |                     | 9.0        | 0.35      | 3.1                          | 1.62                | 9.3                         | 0.51        | 0.14        | 1.03     |
| 0.7         | 205           | 0.085               | 0.1        | 0.52      | 2.5                          | 2.11                | 9.1                         | 0.38        | 0.09        | 1.08     |
|             |               |                     | 4.4        | 0.21      | 2.0                          | 1.23                | 10.6                        | 0.37        | 0.42        | 1.15     |
|             |               |                     | 4.9        | 0.21      | 2.7                          | 1.11                | 10.3                        | 0.44        | 0.35        | 1.11     |
|             |               |                     | 6.9        | 0.28      | 3.1                          | 1.47                | 9.1                         | 0.48        | 0.24        | 1.11     |
|             |               |                     | 9.0        | 0.37      | 3.0                          | 1.63                | 9.0                         | 0.49        | 0.13        | 1.21     |
| 0.9         | 204           | 0.079               | 0.1        | 0.43      | 2.3                          | 2.08                | 8.4                         | 0.46        | 0.11        | 1.04     |
|             |               |                     | 4.4        | 0.22      | 1.2                          | 0.95                | 11.3                        | 0.41        | 0.36        | 1.09     |
|             |               |                     | 4.9        | 0.22      | 2.2                          | 1.20                | 8.5                         | 0.42        | 0.36        | 1.06     |
|             |               |                     | 6.9        | 0.29      | 3.2                          | 1.34                | 8.9                         | 0.45        | 0.27        | 1.02     |
|             |               |                     | 9.0        | 0.38      | 2.3                          | 1.62                | 8.0                         | 0.49        | 0.13        | 1.19     |
| 1.0         | 204           | 0.077               | 0.1        | 0.43      | 1.9                          | 1.97                | 8.1                         | 0.46        | 0.11        | 1.08     |
|             |               |                     | 4.4        | 0.23      | 1.3                          | 1.04                | 11.3                        | 0.37        | 0.40        | 1.06     |
|             |               |                     | 4.9        | 0.21      | 2.3                          | 1.26                | 8.4                         | 0.41        | 0.37        | 1.10     |
|             |               |                     | 6.9        | 0.31      | 2.7                          | 1.34                | 8.3                         | 0.46        | 0.23        | 1.23     |
|             |               |                     | 9.0        | 0.39      | 2.7                          | 1.53                | 8.3                         | 0.48        | 0.13        | 1.23     |
| [GdHCl] (M) | $\tau_M$ (ns) | $k_2$ (ns $^{-1}$ ) | $x$ (mol%) | $f_{Mk2}$ | $k_e[blob]$ ( $\mu s^{-1}$ ) | $\langle n \rangle$ | $k_{blob}$ ( $\mu s^{-1}$ ) | $f_{Mdiff}$ | $f_{Mfree}$ | $\chi^2$ |
| 2.0         | 200           | 0.061               | 0.1        | 0.51      | 4.5                          | 2.02                | 6.5                         | 0.38        | 0.11        | 1.11     |
|             |               |                     | 4.4        | 0.21      | 1.3                          | 0.86                | 10.0                        | 0.42        | 0.36        | 1.08     |
|             |               |                     | 4.9        | 0.24      | 3.4                          | 1.03                | 11.0                        | 0.36        | 0.40        | 1.13     |

|     |     |       |     |      |     |      |      |      |      |      |
|-----|-----|-------|-----|------|-----|------|------|------|------|------|
|     |     |       | 6.9 | 0.34 | 4.7 | 1.13 | 12.4 | 0.47 | 0.20 | 1.19 |
|     |     |       | 9.0 | 0.37 | 2.8 | 1.47 | 7.8  | 0.49 | 0.14 | 1.02 |
| 3.0 | 197 | 0.052 | 0.1 | 0.52 | 4.5 | 2.04 | 5.5  | 0.38 | 0.10 | 1.17 |
|     |     |       | 4.4 | 0.22 | 0.9 | 0.79 | 8.3  | 0.45 | 0.32 | 1.11 |
|     |     |       | 4.9 | 0.22 | 3.6 | 1.10 | 7.4  | 0.38 | 0.40 | 1.09 |
|     |     |       | 6.9 | 0.30 | 2.8 | 1.09 | 7.1  | 0.46 | 0.23 | 1.10 |
|     |     |       | 9.0 | 0.39 | 2.9 | 1.37 | 7.2  | 0.47 | 0.14 | 1.04 |
|     |     |       | 0.1 | 0.54 | 2.9 | 1.62 | 6.2  | 0.40 | 0.06 | 1.19 |
| 4.0 | 194 | 0.045 | 4.4 | 0.22 | 0.9 | 0.56 | 9.1  | 0.53 | 0.25 | 1.07 |
|     |     |       | 4.9 | 0.21 | 6.9 | 1.13 | 7.4  | 0.33 | 0.46 | 1.11 |
|     |     |       | 6.9 | 0.30 | 6.2 | 0.93 | 11.7 | 0.46 | 0.24 | 1.14 |
|     |     |       | 9.0 | 0.35 | 3.0 | 1.33 | 6.7  | 0.51 | 0.14 | 1.08 |
|     |     |       | 0.1 | 0.46 | 0.9 | 1.55 | 5.1  | 0.49 | 0.05 | 1.06 |
| 5.0 | 191 | 0.040 | 4.4 | 0.21 | 0.4 | 0.44 | 8.1  | 0.61 | 0.18 | 1.06 |
|     |     |       | 4.9 | 0.22 | 6.2 | 0.93 | 8.4  | 0.33 | 0.45 | 1.27 |
|     |     |       | 6.9 | 0.23 | 4.4 | 0.95 | 8.1  | 0.44 | 0.33 | 1.09 |
|     |     |       | 9.0 | 0.40 | 8.5 | 1.06 | 9.7  | 0.38 | 0.22 | 1.14 |
|     |     |       |     |      |     |      |      |      |      |      |

**Table S2.** Parameters retrieved using the FBM analysis of the excimer decays of Py(x)-PLGA in DMF solutions containing GdHCl.

| [GdHCl]<br>(M) | $k_2$ (ns <sup>-1</sup> ) | $x$ (mol%) | $f_{E2}$ | $\tau_{E0}$<br>(ns) | $f_{E\text{diff}E0}$ | $f_{EE0}$ | $\tau_D$<br>(ns) | $f_{E\text{diff}D}$ | $f_{ED}$ | $\chi^2$ |
|----------------|---------------------------|------------|----------|---------------------|----------------------|-----------|------------------|---------------------|----------|----------|
| 0.0            | 0.147                     | 0.1        | 0.35     | 41                  | 0.18                 | 0.33      | 69               | 0.14                | 0.00     | 1.06     |
|                |                           | 4.4        | 0.25     | 44                  | 0.45                 | 0.14      | 81               | 0.17                | 0.00     | 1.14     |
|                |                           | 4.9        | 0.22     | 44                  | 0.48                 | 0.11      | 82               | 0.18                | 0.00     | 1.12     |
|                |                           | 6.9        | 0.29     | 48                  | 0.32                 | 0.28      | 81               | 0.12                | 0.00     | 1.04     |
|                |                           | 9.0        | 0.33     | 41                  | 0.35                 | 0.07      | 68               | 0.22                | 0.04     | 1.11     |
| 0.1            | 0.119                     | 0.1        | 0.34     | 48                  | 0.23                 | 0.37      | 79               | 0.06                | 0.00     | 1.05     |
|                |                           | 4.4        | 0.29     | 42                  | 0.50                 | 0.10      | 102              | 0.11                | 0.00     | 1.18     |
|                |                           | 4.9        | 0.22     | 42                  | 0.46                 | 0.11      | 78               | 0.22                | 0.00     | 1.12     |
|                |                           | 6.9        | 0.33     | 46                  | 0.30                 | 0.26      | 83               | 0.10                | 0.01     | 1.21     |
|                |                           | 9.0        | 0.29     | 49                  | 0.29                 | 0.33      | 83               | 0.09                | 0.00     | 1.03     |
| 0.3            | 0.102                     | 0.1        | 0.47     | 45                  | 0.25                 | 0.17      | 69               | 0.08                | 0.03     | 1.11     |
|                |                           | 4.4        | 0.30     | 47                  | 0.46                 | 0.15      | 105              | 0.09                | 0.00     | 1.09     |
|                |                           | 4.9        | 0.28     | 42                  | 0.47                 | 0.10      | 89               | 0.15                | 0.00     | 1.14     |
|                |                           | 6.9        | 0.28     | 45                  | 0.33                 | 0.25      | 82               | 0.11                | 0.03     | 1.16     |
|                |                           | 9.0        | 0.37     | 46                  | 0.31                 | 0.17      | 76               | 0.14                | 0.00     | 1.01     |
| 0.5            | 0.092                     | 0.1        | 0.45     | 47                  | 0.25                 | 0.23      | 71               | 0.07                | 0.00     | 1.05     |
|                |                           | 4.4        | 0.32     | 46                  | 0.43                 | 0.13      | 105              | 0.11                | 0.00     | 1.14     |
|                |                           | 4.9        | 0.29     | 44                  | 0.46                 | 0.11      | 90               | 0.14                | 0.00     | 1.11     |
|                |                           | 6.9        | 0.28     | 48                  | 0.42                 | 0.17      | 86               | 0.12                | 0.00     | 1.11     |
|                |                           | 9.0        | 0.36     | 41                  | 0.44                 | 0.01      | 75               | 0.08                | 0.12     | 1.03     |
| 0.7            | 0.085                     | 0.1        | 0.42     | 47                  | 0.23                 | 0.27      | 71               | 0.08                | 0.01     | 1.08     |
|                |                           | 4.4        | 0.31     | 46                  | 0.47                 | 0.12      | 108              | 0.07                | 0.03     | 1.15     |
|                |                           | 4.9        | 0.30     | 43                  | 0.45                 | 0.10      | 86               | 0.15                | 0.00     | 1.11     |
|                |                           | 6.9        | 0.29     | 46                  | 0.37                 | 0.18      | 87               | 0.12                | 0.04     | 1.11     |
|                |                           | 9.0        | 0.37     | 44                  | 0.36                 | 0.14      | 72               | 0.13                | 0.00     | 1.21     |
| 0.9            | 0.079                     | 0.1        | 0.31     | 47                  | 0.25                 | 0.35      | 72               | 0.08                | 0.00     | 1.04     |
|                |                           | 4.4        | 0.30     | 46                  | 0.45                 | 0.15      | 104              | 0.08                | 0.00     | 1.09     |

|     |       |     |      |    |      |      |     |      |      |      |
|-----|-------|-----|------|----|------|------|-----|------|------|------|
|     |       | 4.9 | 0.31 | 45 | 0.49 | 0.10 | 97  | 0.11 | 0.00 | 1.06 |
|     |       | 6.9 | 0.33 | 47 | 0.40 | 0.15 | 85  | 0.11 | 0.01 | 1.02 |
|     |       | 9.0 | 0.38 | 46 | 0.38 | 0.13 | 79  | 0.11 | 0.00 | 1.19 |
| 1.0 | 0.077 | 0.1 | 0.33 | 41 | 0.21 | 0.20 | 61  | 0.14 | 0.12 | 1.08 |
|     |       | 4.4 | 0.33 | 46 | 0.41 | 0.15 | 97  | 0.08 | 0.00 | 1.06 |
|     |       | 4.9 | 0.30 | 45 | 0.49 | 0.10 | 99  | 0.10 | 0.00 | 1.10 |
|     |       | 6.9 | 0.34 | 47 | 0.40 | 0.14 | 84  | 0.11 | 0.00 | 1.23 |
|     |       | 9.0 | 0.39 | 46 | 0.35 | 0.13 | 72  | 0.13 | 0.00 | 1.23 |
| 2.0 | 0.061 | 0.1 | 0.42 | 47 | 0.23 | 0.22 | 60  | 0.09 | 0.04 | 1.11 |
|     |       | 4.4 | 0.29 | 45 | 0.49 | 0.11 | 106 | 0.07 | 0.04 | 1.08 |
|     |       | 4.9 | 0.33 | 49 | 0.38 | 0.17 | 97  | 0.10 | 0.02 | 1.13 |
|     |       | 6.9 | 0.33 | 48 | 0.35 | 0.20 | 80  | 0.11 | 0.01 | 1.19 |
|     |       | 9.0 | 0.34 | 43 | 0.32 | 0.19 | 69  | 0.14 | 0.00 | 1.02 |
| 3.0 | 0.052 | 0.1 | 0.44 | 46 | 0.22 | 0.17 | 61  | 0.09 | 0.08 | 1.17 |
|     |       | 4.4 | 0.28 | 49 | 0.51 | 0.14 | 124 | 0.06 | 0.01 | 1.11 |
|     |       | 4.9 | 0.32 | 50 | 0.46 | 0.13 | 104 | 0.08 | 0.00 | 1.09 |
|     |       | 6.9 | 0.33 | 49 | 0.35 | 0.10 | 83  | 0.15 | 0.06 | 1.10 |
|     |       | 9.0 | 0.36 | 45 | 0.31 | 0.19 | 73  | 0.13 | 0.01 | 1.04 |
| 4.0 | 0.045 | 0.1 | 0.40 | 49 | 0.21 | 0.20 | 68  | 0.08 | 0.10 | 1.19 |
|     |       | 4.4 | 0.25 | 49 | 0.53 | 0.12 | 118 | 0.07 | 0.03 | 1.07 |
|     |       | 4.9 | 0.30 | 57 | 0.44 | 0.24 | 159 | 0.03 | 0.00 | 1.11 |
|     |       | 6.9 | 0.26 | 51 | 0.32 | 0.32 | 90  | 0.09 | 0.01 | 1.14 |
|     |       | 9.0 | 0.31 | 47 | 0.32 | 0.21 | 77  | 0.13 | 0.02 | 1.08 |
| 5.0 | 0.040 | 0.1 | 0.35 | 46 | 0.29 | 0.21 | 75  | 0.09 | 0.06 | 1.06 |
|     |       | 4.4 | 0.22 | 52 | 0.57 | 0.13 | 136 | 0.07 | 0.01 | 1.06 |
|     |       | 4.9 | 0.32 | 57 | 0.42 | 0.16 | 121 | 0.07 | 0.02 | 1.27 |
|     |       | 6.9 | 0.27 | 51 | 0.38 | 0.16 | 94  | 0.12 | 0.08 | 1.09 |
|     |       | 9.0 | 0.34 | 59 | 0.29 | 0.33 | 119 | 0.03 | 0.00 | 1.14 |

**Table S3.** Global fractions of pyrene species calculated using parameters retrieved from the FBM analysis of Py(x)-PLGA in DMF solutions containing GdHCl.

| [GdHCl]<br>(M) | $x$ (mol%) | $f_{k2}$ | $f_{diffE0}$ | $f_{diffD}$ | $f_{diff}$ | $f_{E0}$ | $f_D$ | $f_{agg}$ | $f_{free}$ | $\chi^2$ |
|----------------|------------|----------|--------------|-------------|------------|----------|-------|-----------|------------|----------|
| 0.0            | 0.1        | 0.33     | 0.17         | 0.13        | 0.31       | 0.31     | 0.00  | 0.31      | 0.06       | 1.06     |
|                | 4.4        | 0.19     | 0.34         | 0.13        | 0.47       | 0.10     | 0.00  | 0.10      | 0.23       | 1.14     |
|                | 4.9        | 0.19     | 0.40         | 0.15        | 0.56       | 0.09     | 0.00  | 0.09      | 0.16       | 1.12     |
|                | 6.9        | 0.27     | 0.29         | 0.11        | 0.40       | 0.25     | 0.00  | 0.25      | 0.08       | 1.04     |
|                | 9.0        | 0.31     | 0.33         | 0.21        | 0.53       | 0.06     | 0.04  | 0.10      | 0.06       | 1.11     |
| 0.1            | 0.1        | 0.31     | 0.21         | 0.05        | 0.27       | 0.34     | 0.00  | 0.34      | 0.08       | 1.05     |
|                | 4.4        | 0.19     | 0.34         | 0.07        | 0.41       | 0.07     | 0.00  | 0.07      | 0.33       | 1.18     |
|                | 4.9        | 0.18     | 0.38         | 0.18        | 0.56       | 0.09     | 0.00  | 0.09      | 0.16       | 1.12     |
|                | 6.9        | 0.28     | 0.25         | 0.09        | 0.34       | 0.22     | 0.01  | 0.23      | 0.15       | 1.21     |
|                | 9.0        | 0.27     | 0.27         | 0.08        | 0.35       | 0.30     | 0.00  | 0.30      | 0.08       | 1.03     |
| 0.3            | 0.1        | 0.45     | 0.23         | 0.08        | 0.31       | 0.16     | 0.03  | 0.19      | 0.06       | 1.11     |
|                | 4.4        | 0.19     | 0.29         | 0.06        | 0.35       | 0.09     | 0.00  | 0.09      | 0.37       | 1.09     |
|                | 4.9        | 0.19     | 0.31         | 0.10        | 0.41       | 0.06     | 0.00  | 0.06      | 0.34       | 1.14     |
|                | 6.9        | 0.25     | 0.28         | 0.10        | 0.38       | 0.21     | 0.03  | 0.24      | 0.13       | 1.16     |
|                | 9.0        | 0.34     | 0.28         | 0.13        | 0.41       | 0.16     | 0.00  | 0.16      | 0.09       | 1.01     |
| 0.5            | 0.1        | 0.43     | 0.24         | 0.07        | 0.30       | 0.22     | 0.00  | 0.22      | 0.05       | 1.05     |

|     |     |      |      |      |      |      |      |      |      |      |
|-----|-----|------|------|------|------|------|------|------|------|------|
|     | 4.4 | 0.21 | 0.28 | 0.07 | 0.35 | 0.09 | 0.00 | 0.09 | 0.35 | 1.14 |
|     | 4.9 | 0.20 | 0.31 | 0.10 | 0.41 | 0.07 | 0.00 | 0.07 | 0.32 | 1.11 |
|     | 6.9 | 0.23 | 0.35 | 0.10 | 0.46 | 0.14 | 0.00 | 0.15 | 0.16 | 1.11 |
|     | 9.0 | 0.31 | 0.38 | 0.07 | 0.45 | 0.01 | 0.10 | 0.11 | 0.13 | 1.03 |
| 0.7 | 0.1 | 0.39 | 0.21 | 0.07 | 0.28 | 0.25 | 0.01 | 0.26 | 0.07 | 1.08 |
|     | 4.4 | 0.19 | 0.29 | 0.04 | 0.34 | 0.08 | 0.02 | 0.10 | 0.38 | 1.15 |
|     | 4.9 | 0.20 | 0.30 | 0.10 | 0.41 | 0.07 | 0.00 | 0.07 | 0.32 | 1.11 |
|     | 6.9 | 0.23 | 0.30 | 0.10 | 0.40 | 0.14 | 0.03 | 0.17 | 0.20 | 1.11 |
|     | 9.0 | 0.33 | 0.31 | 0.12 | 0.43 | 0.12 | 0.00 | 0.12 | 0.12 | 1.21 |
| 0.9 | 0.1 | 0.28 | 0.24 | 0.07 | 0.31 | 0.33 | 0.00 | 0.33 | 0.08 | 1.04 |
|     | 4.4 | 0.20 | 0.32 | 0.06 | 0.37 | 0.10 | 0.00 | 0.10 | 0.33 | 1.09 |
|     | 4.9 | 0.20 | 0.32 | 0.07 | 0.39 | 0.06 | 0.00 | 0.06 | 0.34 | 1.06 |
|     | 6.9 | 0.26 | 0.31 | 0.09 | 0.39 | 0.11 | 0.01 | 0.12 | 0.23 | 1.02 |
|     | 9.0 | 0.33 | 0.34 | 0.10 | 0.43 | 0.11 | 0.00 | 0.11 | 0.12 | 1.19 |
| 1.0 | 0.1 | 0.31 | 0.19 | 0.13 | 0.33 | 0.18 | 0.11 | 0.29 | 0.08 | 1.08 |
|     | 4.4 | 0.21 | 0.28 | 0.05 | 0.33 | 0.10 | 0.00 | 0.10 | 0.36 | 1.06 |
|     | 4.9 | 0.20 | 0.32 | 0.07 | 0.39 | 0.07 | 0.00 | 0.07 | 0.35 | 1.10 |
|     | 6.9 | 0.27 | 0.32 | 0.09 | 0.41 | 0.12 | 0.00 | 0.12 | 0.20 | 1.23 |
|     | 9.0 | 0.34 | 0.31 | 0.12 | 0.42 | 0.12 | 0.00 | 0.12 | 0.11 | 1.23 |
| 2.0 | 0.1 | 0.39 | 0.21 | 0.08 | 0.29 | 0.20 | 0.04 | 0.24 | 0.08 | 1.11 |
|     | 4.4 | 0.19 | 0.33 | 0.05 | 0.38 | 0.07 | 0.02 | 0.10 | 0.33 | 1.08 |
|     | 4.9 | 0.21 | 0.24 | 0.07 | 0.31 | 0.11 | 0.01 | 0.13 | 0.35 | 1.13 |
|     | 6.9 | 0.28 | 0.29 | 0.09 | 0.39 | 0.16 | 0.00 | 0.17 | 0.16 | 1.19 |
|     | 9.0 | 0.30 | 0.29 | 0.12 | 0.41 | 0.17 | 0.00 | 0.18 | 0.11 | 1.02 |
| 3.0 | 0.1 | 0.40 | 0.21 | 0.09 | 0.29 | 0.15 | 0.07 | 0.23 | 0.08 | 1.17 |
|     | 4.4 | 0.20 | 0.36 | 0.04 | 0.40 | 0.10 | 0.01 | 0.11 | 0.29 | 1.11 |
|     | 4.9 | 0.20 | 0.29 | 0.05 | 0.35 | 0.08 | 0.00 | 0.08 | 0.37 | 1.09 |
|     | 6.9 | 0.26 | 0.28 | 0.12 | 0.40 | 0.08 | 0.05 | 0.13 | 0.20 | 1.10 |
|     | 9.0 | 0.32 | 0.27 | 0.12 | 0.39 | 0.17 | 0.01 | 0.18 | 0.11 | 1.04 |
| 4.0 | 0.1 | 0.38 | 0.20 | 0.08 | 0.28 | 0.19 | 0.10 | 0.29 | 0.04 | 1.19 |
|     | 4.4 | 0.19 | 0.41 | 0.06 | 0.47 | 0.09 | 0.02 | 0.11 | 0.22 | 1.07 |
|     | 4.9 | 0.18 | 0.26 | 0.02 | 0.28 | 0.14 | 0.00 | 0.14 | 0.40 | 1.11 |
|     | 6.9 | 0.22 | 0.26 | 0.07 | 0.33 | 0.26 | 0.01 | 0.27 | 0.17 | 1.14 |
|     | 9.0 | 0.28 | 0.29 | 0.12 | 0.40 | 0.19 | 0.02 | 0.21 | 0.11 | 1.08 |
| 5.0 | 0.1 | 0.34 | 0.28 | 0.09 | 0.36 | 0.21 | 0.06 | 0.26 | 0.04 | 1.06 |
|     | 4.4 | 0.18 | 0.48 | 0.06 | 0.54 | 0.11 | 0.01 | 0.12 | 0.16 | 1.06 |
|     | 4.9 | 0.19 | 0.25 | 0.04 | 0.29 | 0.10 | 0.01 | 0.11 | 0.40 | 1.27 |
|     | 6.9 | 0.19 | 0.27 | 0.09 | 0.36 | 0.11 | 0.06 | 0.17 | 0.27 | 1.09 |
|     | 9.0 | 0.28 | 0.25 | 0.03 | 0.27 | 0.28 | 0.00 | 0.28 | 0.16 | 1.14 |

**Table S4.** Parameters retrieved using the FBM analysis of the monomer decays of Py(x)-PDLGA in DMF solutions containing GdHCl.

| [GdHCl]<br>(M) | $\tau_M$<br>(ns) | $k_2$ (ns <sup>-1</sup> ) | $x$ (mol%) | $f_{Mk2}$ | $k_e(\text{blob})$<br>( $\mu\text{s}^{-1}$ ) | $\langle n \rangle$ | $k_{\text{blob}}$<br>( $\mu\text{s}^{-1}$ ) | $f_{M\text{diff}}$ | $f_{M\text{free}}$ | $\chi^2$ |
|----------------|------------------|---------------------------|------------|-----------|----------------------------------------------|---------------------|---------------------------------------------|--------------------|--------------------|----------|
| 0.0            | 215              | 0.147                     | 6.0        | 0.14      | 0.2                                          | 0.81                | 12.5                                        | 0.50               | 0.36               | 1.19     |
|                |                  |                           | 8.0        | 0.29      | 3.8                                          | 1.41                | 14.7                                        | 0.39               | 0.32               | 1.16     |
|                |                  |                           | 10.4       | 0.26      | 2.7                                          | 1.51                | 12.0                                        | 0.45               | 0.29               | 1.21     |
|                |                  |                           | 11.5       | 0.22      | 3.4                                          | 1.34                | 13.9                                        | 0.50               | 0.28               | 1.29     |
|                |                  |                           | 12.4       | 0.25      | 3.0                                          | 1.50                | 12.9                                        | 0.50               | 0.24               | 1.13     |

|     |     |       |      |      |     |      |      |      |      |      |
|-----|-----|-------|------|------|-----|------|------|------|------|------|
| 0.7 | 205 | 0.085 | 6.0  | 0.20 | 0.0 | 0.88 | 10.6 | 0.44 | 0.36 | 1.09 |
|     |     |       | 8.0  | 0.26 | 0.7 | 1.28 | 10.1 | 0.43 | 0.31 | 1.02 |
|     |     |       | 10.4 | 0.36 | 0.4 | 1.46 | 8.9  | 0.45 | 0.19 | 1.17 |
|     |     |       | 11.5 | 0.30 | 4.2 | 1.84 | 8.4  | 0.49 | 0.22 | 1.09 |
|     |     |       | 12.4 | 0.30 | 3.9 | 1.65 | 9.2  | 0.47 | 0.23 | 1.07 |
| 1.0 | 204 | 0.077 | 6.0  | 0.22 | 0.0 | 0.80 | 10.6 | 0.45 | 0.33 | 1.13 |
|     |     |       | 8.0  | 0.27 | 0.5 | 1.04 | 10.1 | 0.49 | 0.24 | 1.29 |
|     |     |       | 10.4 | 0.38 | 0.4 | 1.41 | 8.4  | 0.44 | 0.18 | 1.26 |
|     |     |       | 11.5 | 0.32 | 4.7 | 1.67 | 9.3  | 0.48 | 0.20 | 1.09 |
|     |     |       | 12.4 | 0.38 | 5.0 | 1.79 | 9.3  | 0.45 | 0.17 | 1.07 |
| 3.0 | 197 | 0.052 | 6.0  | 0.28 | 2.4 | 0.84 | 5.7  | 0.40 | 0.32 | 1.11 |
|     |     |       | 8.0  | 0.30 | 1.2 | 1.34 | 6.4  | 0.39 | 0.31 | 1.12 |
|     |     |       | 10.4 | 0.35 | 0.7 | 1.60 | 5.5  | 0.42 | 0.22 | 1.22 |
|     |     |       | 11.5 | 0.35 | 3.3 | 1.71 | 5.1  | 0.44 | 0.21 | 1.12 |
|     |     |       | 12.4 | 0.34 | 3.3 | 1.75 | 6.0  | 0.47 | 0.19 | 1.11 |
| 5.0 | 191 | 0.040 | 6.0  | 0.19 | 0.0 | 0.95 | 5.9  | 0.33 | 0.48 | 1.00 |
|     |     |       | 8.0  | 0.27 | 0.6 | 0.96 | 5.6  | 0.45 | 0.27 | 1.16 |
|     |     |       | 10.4 | 0.30 | 2.1 | 1.43 | 5.3  | 0.41 | 0.29 | 1.09 |
|     |     |       | 11.5 | 0.28 | 3.4 | 1.40 | 4.7  | 0.46 | 0.26 | 1.10 |
|     |     |       | 12.4 | 0.31 | 2.7 | 1.72 | 4.1  | 0.47 | 0.22 | 1.09 |

**Table S5.** Parameters retrieved using the FBM analysis of the excimer decays of Py(*x*)-PDLGA in DMF solutions containing GdHCl.

| [GdHCl]<br>(M) | $k_2$ (ns <sup>-1</sup> ) | $x$ (mol%) | $f_{E_k2}$ | $\tau_{E0}$<br>(ns) | $f_{E_{diff}E0}$ | $f_{EE0}$ | $\tau_D$<br>(ns) | $f_{E_{diff}D}$ | $f_{ED}$ | $\chi^2$ |
|----------------|---------------------------|------------|------------|---------------------|------------------|-----------|------------------|-----------------|----------|----------|
| 0.0            | 0.147                     | 6.0        | 0.20       | 38                  | 0.64             | 0.05      | 105              | 0.10            | 0.00     | 1.19     |
|                |                           | 8.0        | 0.40       | 47                  | 0.37             | 0.06      | 77               | 0.17            | 0.00     | 1.16     |
|                |                           | 10.4       | 0.35       | 42                  | 0.41             | 0.07      | 75               | 0.18            | 0.00     | 1.21     |
|                |                           | 11.5       | 0.27       | 44                  | 0.43             | 0.12      | 77               | 0.19            | 0.00     | 1.29     |
|                |                           | 12.4       | 0.30       | 42                  | 0.40             | 0.11      | 74               | 0.19            | 0.01     | 1.13     |
| 0.7            | 0.085                     | 6.0        | 0.28       | 48                  | 0.52             | 0.12      | 123              | 0.08            | 0.00     | 1.09     |
|                |                           | 8.0        | 0.32       | 44                  | 0.42             | 0.14      | 87               | 0.12            | 0.00     | 1.02     |
|                |                           | 10.4       | 0.38       | 46                  | 0.38             | 0.14      | 85               | 0.10            | 0.00     | 1.17     |
|                |                           | 11.5       | 0.31       | 46                  | 0.39             | 0.17      | 81               | 0.12            | 0.00     | 1.09     |
|                |                           | 12.4       | 0.34       | 45                  | 0.38             | 0.13      | 77               | 0.16            | 0.00     | 1.07     |
| 1.0            | 0.077                     | 6.0        | 0.29       | 49                  | 0.52             | 0.12      | 123              | 0.08            | 0.00     | 1.13     |
|                |                           | 8.0        | 0.32       | 45                  | 0.44             | 0.12      | 93               | 0.12            | 0.00     | 1.29     |
|                |                           | 10.4       | 0.40       | 48                  | 0.37             | 0.14      | 86               | 0.09            | 0.00     | 1.26     |
|                |                           | 11.5       | 0.34       | 47                  | 0.37             | 0.17      | 77               | 0.13            | 0.00     | 1.09     |
|                |                           | 12.4       | 0.37       | 48                  | 0.33             | 0.19      | 74               | 0.11            | 0.00     | 1.07     |
| 3.0            | 0.052                     | 6.0        | 0.35       | 59                  | 0.29             | 0.09      | 66               | 0.20            | 0.07     | 1.11     |
|                |                           | 8.0        | 0.37       | 50                  | 0.37             | 0.16      | 93               | 0.10            | 0.00     | 1.12     |
|                |                           | 10.4       | 0.39       | 47                  | 0.36             | 0.15      | 82               | 0.11            | 0.00     | 1.22     |
|                |                           | 11.5       | 0.38       | 48                  | 0.34             | 0.14      | 77               | 0.13            | 0.00     | 1.12     |
|                |                           | 12.4       | 0.35       | 45                  | 0.37             | 0.17      | 76               | 0.12            | 0.00     | 1.11     |
| 5.0            | 0.040                     | 6.0        | 0.29       | 54                  | 0.46             | 0.18      | 139              | 0.06            | 0.02     | 1.00     |
|                |                           | 8.0        | 0.32       | 50                  | 0.45             | 0.13      | 105              | 0.09            | 0.00     | 1.16     |
|                |                           | 10.4       | 0.35       | 49                  | 0.38             | 0.16      | 93               | 0.10            | 0.00     | 1.09     |
|                |                           | 11.5       | 0.33       | 49                  | 0.42             | 0.13      | 90               | 0.11            | 0.00     | 1.10     |



|  |      |      |    |      |      |    |      |      |      |
|--|------|------|----|------|------|----|------|------|------|
|  | 12.4 | 0.35 | 46 | 0.39 | 0.13 | 80 | 0.13 | 0.00 | 1.09 |
|--|------|------|----|------|------|----|------|------|------|

**Table S6.** Global fractions of pyrene species calculated using parameters retrieved from the FBM analysis of Py(*x*)-PDLGA in DMF solutions containing GdHCl.

| [GdHCl]<br>(M) | <i>x</i> (mol%) | <i>f</i> <sub>k2</sub> | <i>f</i> <sub>diffE0</sub> | <i>f</i> <sub>diffD</sub> | <i>f</i> <sub>diff</sub> | <i>f</i> <sub>E0</sub> | <i>f</i> <sub>D</sub> | <i>f</i> <sub>agg</sub> | <i>f</i> <sub>free</sub> | χ <sup>2</sup> |
|----------------|-----------------|------------------------|----------------------------|---------------------------|--------------------------|------------------------|-----------------------|-------------------------|--------------------------|----------------|
| 0.0            | 6.0             | 0.13                   | 0.42                       | 0.07                      | 0.49                     | 0.03                   | 0.00                  | 0.03                    | 0.35                     | 1.19           |
|                | 8.0             | 0.28                   | 0.26                       | 0.12                      | 0.37                     | 0.04                   | 0.00                  | 0.04                    | 0.30                     | 1.16           |
|                | 10.4            | 0.25                   | 0.30                       | 0.13                      | 0.43                     | 0.05                   | 0.00                  | 0.05                    | 0.27                     | 1.21           |
|                | 11.5            | 0.20                   | 0.32                       | 0.14                      | 0.46                     | 0.09                   | 0.00                  | 0.09                    | 0.26                     | 1.29           |
|                | 12.4            | 0.23                   | 0.31                       | 0.15                      | 0.46                     | 0.08                   | 0.01                  | 0.09                    | 0.22                     | 1.13           |
| 0.7            | 6.0             | 0.19                   | 0.35                       | 0.05                      | 0.40                     | 0.08                   | 0.00                  | 0.08                    | 0.33                     | 1.09           |
|                | 8.0             | 0.23                   | 0.30                       | 0.09                      | 0.39                     | 0.10                   | 0.00                  | 0.10                    | 0.28                     | 1.02           |
|                | 10.4            | 0.32                   | 0.32                       | 0.08                      | 0.40                     | 0.12                   | 0.00                  | 0.12                    | 0.17                     | 1.17           |
|                | 11.5            | 0.26                   | 0.32                       | 0.10                      | 0.42                     | 0.14                   | 0.00                  | 0.14                    | 0.19                     | 1.09           |
|                | 12.4            | 0.27                   | 0.30                       | 0.12                      | 0.42                     | 0.10                   | 0.00                  | 0.10                    | 0.21                     | 1.07           |
| 1.0            | 6.0             | 0.20                   | 0.36                       | 0.05                      | 0.42                     | 0.08                   | 0.00                  | 0.08                    | 0.30                     | 1.13           |
|                | 8.0             | 0.25                   | 0.35                       | 0.09                      | 0.44                     | 0.10                   | 0.00                  | 0.10                    | 0.22                     | 1.29           |
|                | 10.4            | 0.34                   | 0.31                       | 0.07                      | 0.39                     | 0.12                   | 0.00                  | 0.12                    | 0.16                     | 1.26           |
|                | 11.5            | 0.28                   | 0.31                       | 0.10                      | 0.41                     | 0.14                   | 0.00                  | 0.14                    | 0.17                     | 1.09           |
|                | 12.4            | 0.32                   | 0.28                       | 0.09                      | 0.38                     | 0.17                   | 0.00                  | 0.17                    | 0.14                     | 1.07           |
| 3.0            | 6.0             | 0.25                   | 0.21                       | 0.15                      | 0.35                     | 0.07                   | 0.05                  | 0.12                    | 0.28                     | 1.11           |
|                | 8.0             | 0.27                   | 0.27                       | 0.07                      | 0.34                     | 0.12                   | 0.00                  | 0.12                    | 0.28                     | 1.12           |
|                | 10.4            | 0.31                   | 0.29                       | 0.09                      | 0.37                     | 0.12                   | 0.00                  | 0.12                    | 0.20                     | 1.22           |
|                | 11.5            | 0.31                   | 0.28                       | 0.11                      | 0.39                     | 0.11                   | 0.00                  | 0.11                    | 0.18                     | 1.12           |
|                | 12.4            | 0.29                   | 0.31                       | 0.10                      | 0.40                     | 0.14                   | 0.00                  | 0.14                    | 0.16                     | 1.11           |
| 5.0            | 6.0             | 0.16                   | 0.26                       | 0.03                      | 0.30                     | 0.10                   | 0.01                  | 0.11                    | 0.43                     | 1.00           |
|                | 8.0             | 0.24                   | 0.34                       | 0.07                      | 0.41                     | 0.10                   | 0.00                  | 0.10                    | 0.25                     | 1.16           |
|                | 10.4            | 0.26                   | 0.29                       | 0.08                      | 0.36                     | 0.12                   | 0.00                  | 0.12                    | 0.25                     | 1.09           |
|                | 11.5            | 0.26                   | 0.32                       | 0.09                      | 0.41                     | 0.10                   | 0.00                  | 0.10                    | 0.23                     | 1.10           |
|                | 12.4            | 0.28                   | 0.32                       | 0.10                      | 0.42                     | 0.11                   | 0.00                  | 0.11                    | 0.20                     | 1.09           |
